# Supplementary material for: The blood fluke Schistosoma mansoni cleaves the coagulation protein high molecular weight kininogen (HK) but does not generate the vasodilator bradykinin
Source: PubMed Central journal article supplement (PMC5853081; doi:10.1186/s13071-018-2704-0), 2018-03-14
Supplement: 13071_2018_2704_MOESM1_ESM.pdf [file 13071_2018_2704_MOESM1_ESM.pdf]

**Table S1**

**Sequences of peptides identified by mass spectrometry from protein spots 1 – 4 (as shown in figure 1A).** Spots 1 and 2 are from plasma sample obtained in the absence of parasites (green) and spots 3 and 4 are from plasma sample that contained adult schistosomes (red), as described in methods. An “x” indicates that the peptide was found in the indicated protein spot. The amino acid start and end positions of each peptide within the murine high molecular weight kininogen (accession designation: KNG1\_MOUSE) sequence are given.

| <b>Start</b> | <b>End</b> | <b>Sequence</b>          | <b>Spot 1</b> | <b>Spot 2</b> | <b>Spot 3</b> | <b>Spot 4</b> |
|--------------|------------|--------------------------|---------------|---------------|---------------|---------------|
| 50           | 58         | SGNQYMLHR                | X             | X             | X             | X             |
| 65           | 75         | TDGSPTFYSEK              | X             | X             | X             | X             |
| 98           | 113        | DAEEAATGECTATVGK         |               |               | X             | X             |
| 114          | 126        | RENEFFIVTQTCK            |               | X             |               |               |
| 115          | 126        | ENEFFIVTQTCK             | X             | X             | X             | X             |
| 115          | 131        | ENEFFIVTQTCKIAPSK        |               |               | X             | X             |
| 137          | 160        | AYFPCIGCVHAISTDSPDLEPVLK | X             | X             |               | X             |
| 208          | 229        | ERFPSLHGDCVALPNGDDGECR   | X             | X             | X             | X             |
| 210          | 229        | FPSLHGDCVALPNGDDGECR     | X             | X             | X             | X             |
| 230          | 239        | GNLFMDINNK               | X             | X             | X             | X             |
| 269          | 278        | DIPVDSPK                 |               |               |               | X             |
| 279          | 299        | EVLGHSAQLNAENDHPFYK      |               | X             | X             | X             |
| 306          | 315        | ATSQVVAGTK               |               |               |               | X             |
| 316          | 323        | YVIEFIAR                 | X             | X             | X             | X             |
| 330          | 342        | ESNTELAEDCEIK            | X             | X             | X             | X             |
| 343          | 362        | HLGQSLDCNANVYMRPWENK     | X             | X             | X             | X             |
| 369          | 379        | CQALDMTEMAR              |               | X             |               |               |
| 369          | 388        | CQALDMTEMARPPGFSPFR      |               |               | X             |               |
| 380          | 388        | RPPGFSPFR                | X             | X             |               |               |
| 400          | 408        | TVSPPYAR                 |               |               | X             | X             |
| 409          | 431        | EQEERDAETEQQPTHGHGWLHEK  | X             |               |               |               |
| 414          | 431        | DAETEQQPTHGHGWLHEK       | X             |               |               |               |
| 444          | 454        | HGHDHGHWSR               | X             |               |               |               |
| 455          | 475        | RHGLGHGHQKPHGLGHGHQLK    | X             |               |               |               |
| 456          | 475        | HGLGHGHQKPHGLGHGHQLK     | X             |               |               |               |
| 619          | 630        | LISDFPEATSPK             | X             | X             |               |               |
